# Supplementary material for: A novel compound active against SARS-CoV-2 targeting uridylate-specific endoribonuclease (NendoU/NSP15): in silico and in vitro investigations
Source: Royal Society of Chemistry journal article supplement (doi:10.1039/d1md00202c), 2021-01-01
Supplement: d1md00202c1.pdf [file d1md00202c1.pdf]

## SUPPORTING INFORMATION

### A novel compound active against SARS-CoV-2 targeting Uridylate-specific endoribonuclease (NendoU/NSP15): *In silico* and *in vitro* investigations

Sumit Kumar<sup>1†</sup>, Yash Gupta<sup>2†</sup>, Samantha E. Zak<sup>3,4</sup>, Charu Upadhyay<sup>1</sup>, Neha Sharma<sup>5</sup>, Andrew S. Herbert<sup>3</sup>, Ravi Durvasula<sup>2</sup>, Vladimir Potemkin<sup>6</sup>, John M. Dye<sup>3,4</sup>, Poonam<sup>1\*</sup>, Prakasha Kempaiah<sup>2\*</sup> and Brijesh Rathi<sup>5\*</sup>

<sup>1</sup> Department of Chemistry, Miranda House, University of Delhi, Delhi India

<sup>2</sup> Division of Infectious Diseases, Mayo Clinic, Jacksonville, Florida, USA

<sup>3</sup>United States Army Medical Research Institute of Infectious Diseases, Fort Detrick, MD, USA

<sup>4</sup>The Geneva Foundation, 917 Pacific Avenue, Tacoma, WA, USA

<sup>5</sup>Laboratory for Translational Chemistry and Drug Discovery, Department of Chemistry, Hansraj College, University of Delhi, India

<sup>6</sup>South Ural State University, Laboratory of Computational Modelling of Drugs, 454080, Russia

† These authors contributed equally\*

**Address correspondence:** Drs. Poonam, Ph.D.; Prakasha Kempaiah, Ph.D.; Brijesh Rathi, Ph.D. Ph.D.; e-mails: Kempaiah.Prakasha@mayo.edu/ poonam.chemistry@mirandahouse.ac.in /brijeshrathi@hrc.du.ac.in

| Entry No. | Contents                                                                                                                                                                                                                     | Page No.  |
|-----------|------------------------------------------------------------------------------------------------------------------------------------------------------------------------------------------------------------------------------|-----------|
| 1.        | <b>Figure S1.</b> <sup>1</sup> H-NMR spectra of compound <b>IV</b> in CDCl <sub>3</sub> .                                                                                                                                    | <b>S2</b> |
| 2.        | <b>Figure S2.</b> <sup>13</sup> C-NMR spectra of compound <b>IV</b> in CDCl <sub>3</sub> .                                                                                                                                   | <b>S2</b> |
| 3.        | <b>Figure S3.</b> <sup>1</sup> H-NMR spectra of compound <b>III</b> in CDCl <sub>3</sub> .                                                                                                                                   | <b>S3</b> |
| 4.        | <b>Figure S4.</b> <sup>13</sup> C-NMR spectra of compound <b>III</b> in CDCl <sub>3</sub> .                                                                                                                                  | <b>S3</b> |
| 5.        | <b>Figure S5.</b> Schematic representation of 2D interaction maps of: (A) nucleotide (active site bound substrate); and (B) 3'-uridinemonophosphate (3'-UMP; Active site bound product) against NendoU enzyme of SARS-CoV-2. | <b>S4</b> |
| 6.        | <b>Figure S6.</b> HPLC purity analysis for compound <b>IV</b> .                                                                                                                                                              | <b>S4</b> |
| 7.        | <b>Figure S7.</b> Cytotoxicity of Compounds tested.                                                                                                                                                                          | <b>S5</b> |

SUPPORTING INFORMATION

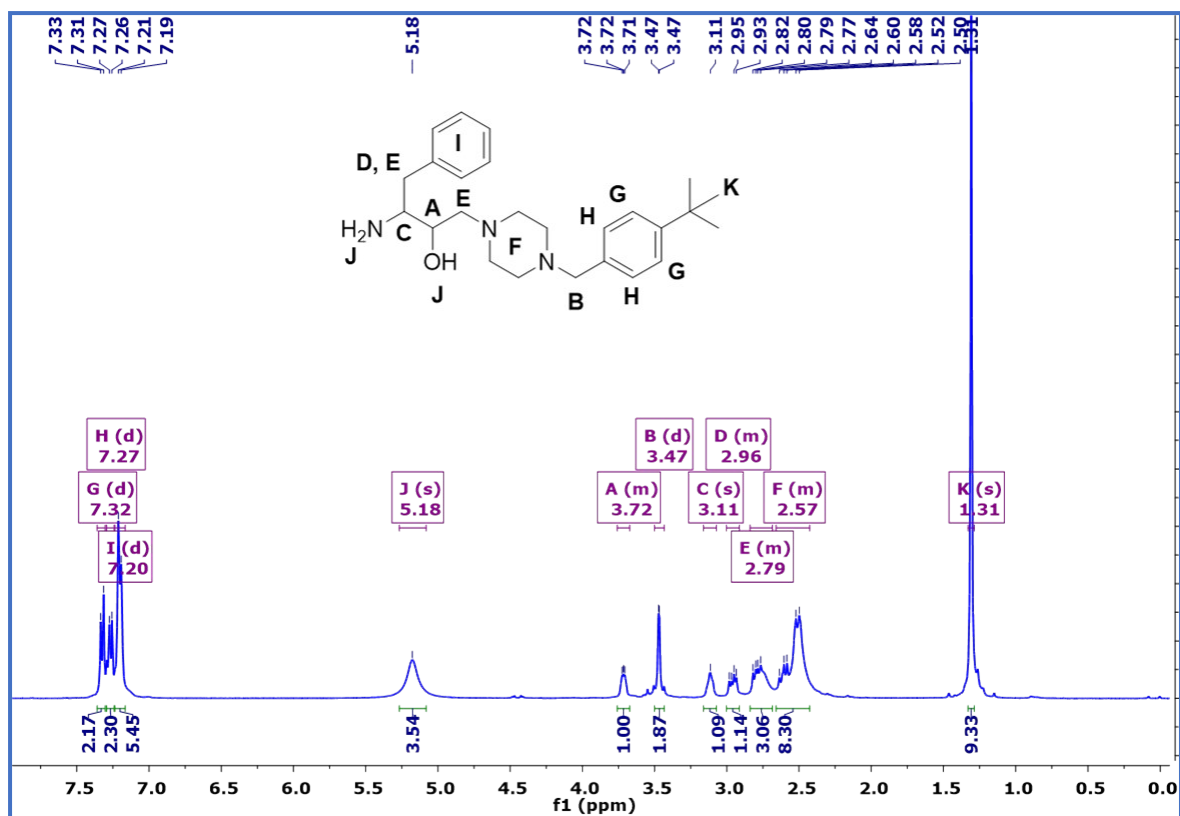

**Figure S1.** <sup>1</sup>H NMR spectrum of compound, IV in CDCl<sub>3</sub>.

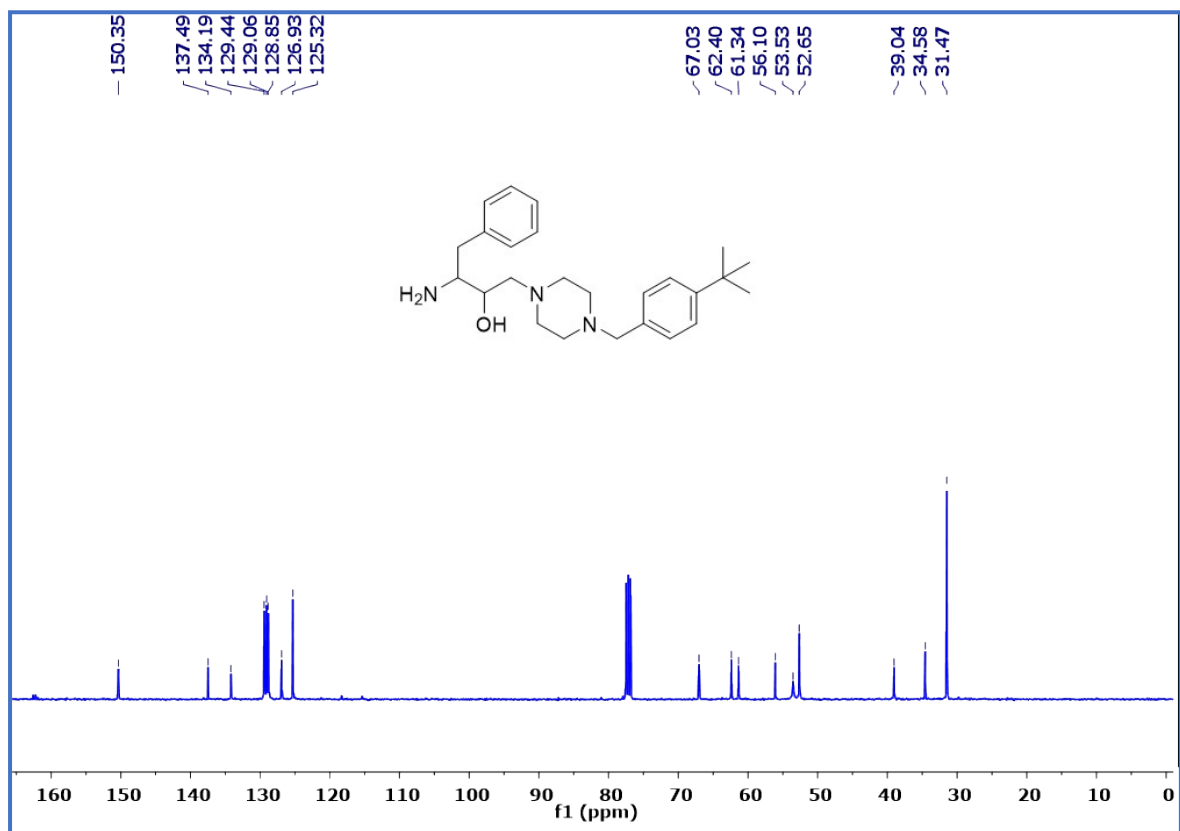

**Figure S2.** <sup>13</sup>C NMR spectrum of compound, IV in CDCl<sub>3</sub>.

SUPPORTING INFORMATION

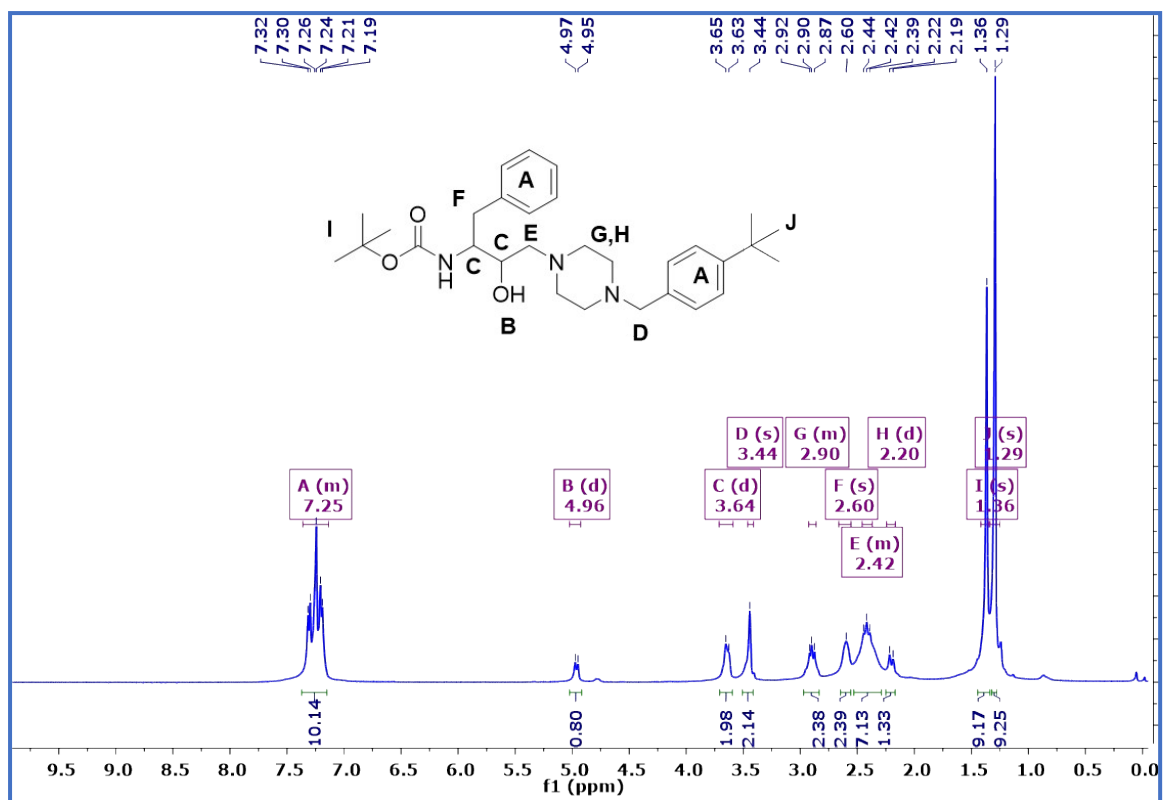

Figure S3. <sup>1</sup>H NMR spectrum of compound, III in CDCl<sub>3</sub>.

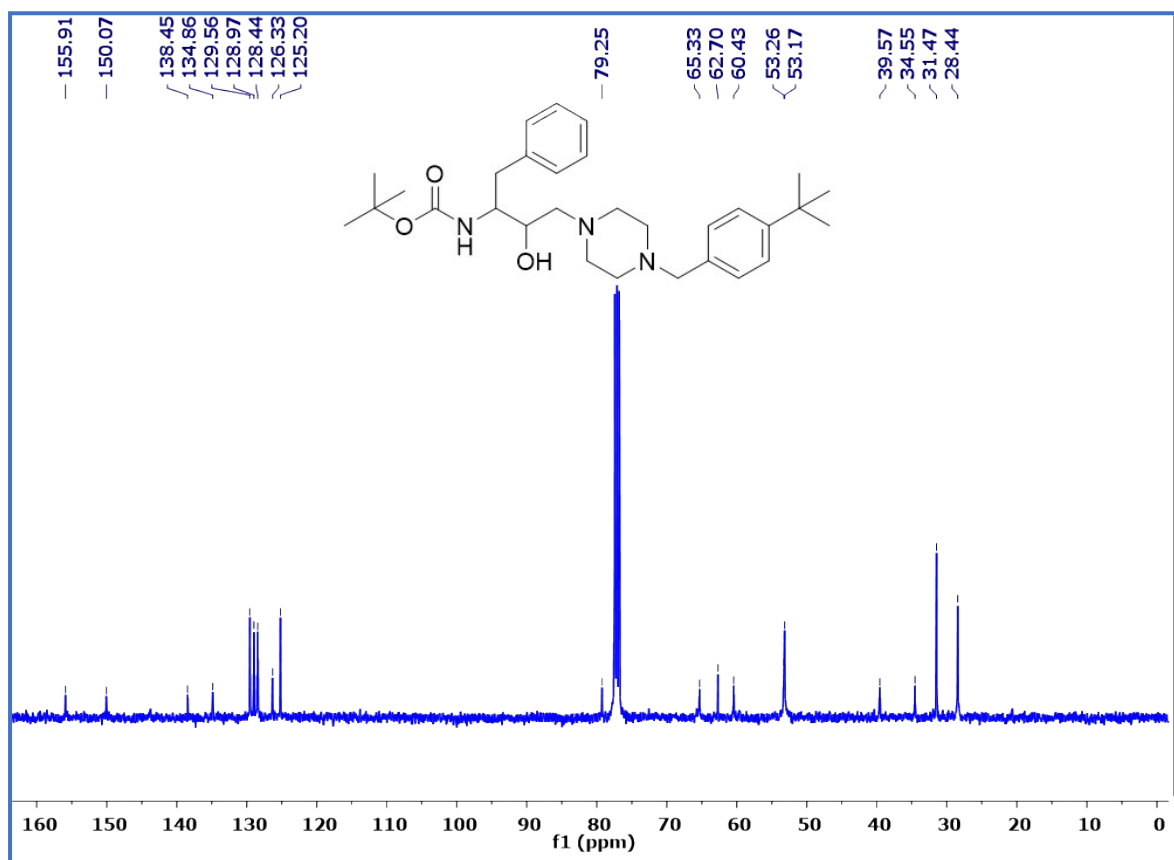

Figure S4. <sup>13</sup>C NMR spectrum of compound, III in CDCl<sub>3</sub>.

## SUPPORTING INFORMATION

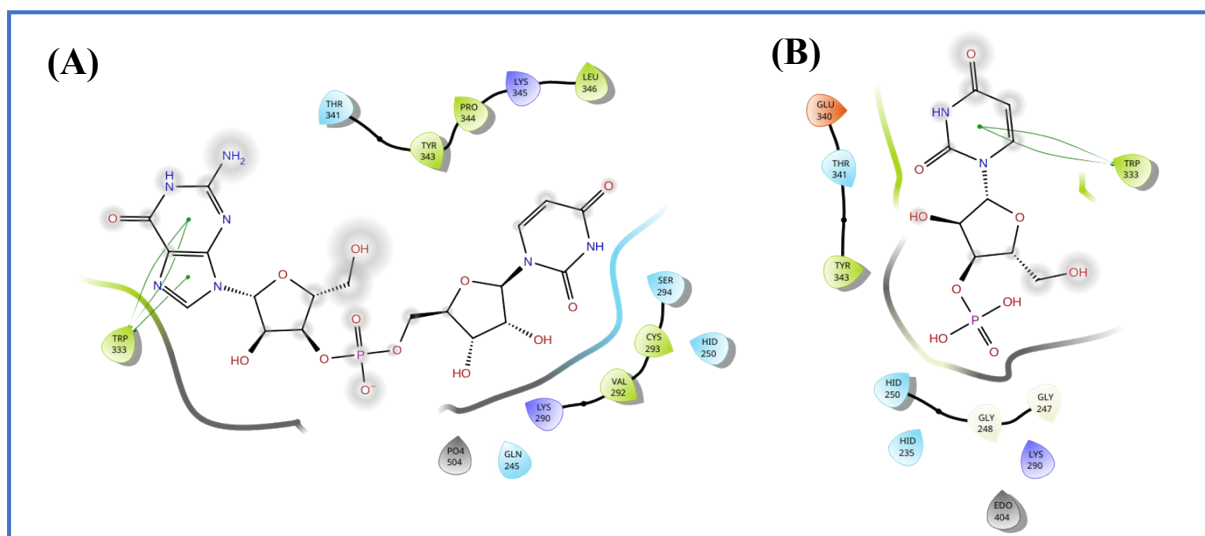

**Figure S5. Schematic representation of 2D interaction maps of: A) nucleotide (active site bound substrate); and B) 3'-uridinemonophosphate (3'-UMP; Active site bound product) against NendoU enzyme of SARS-CoV-2.**

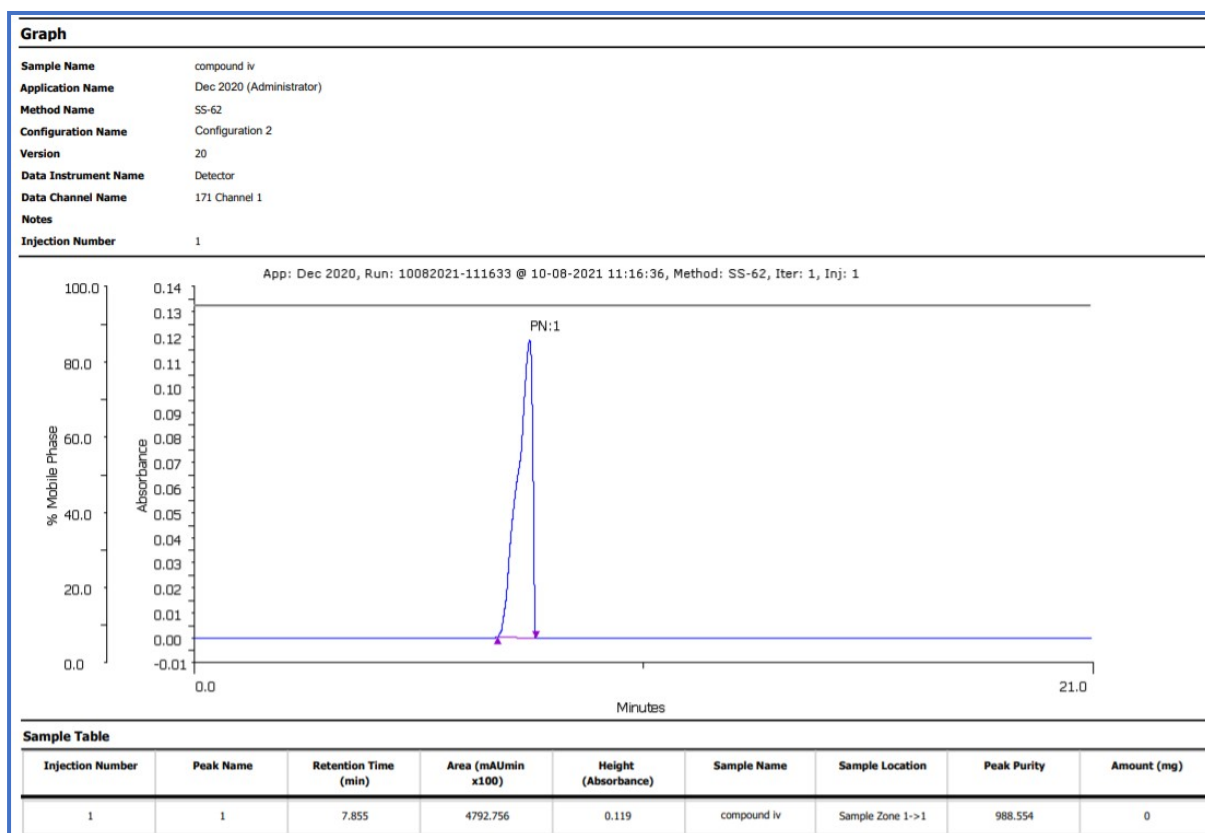

**Figure S6. HPLC purity analysis for compound IV.**

## SUPPORTING INFORMATION

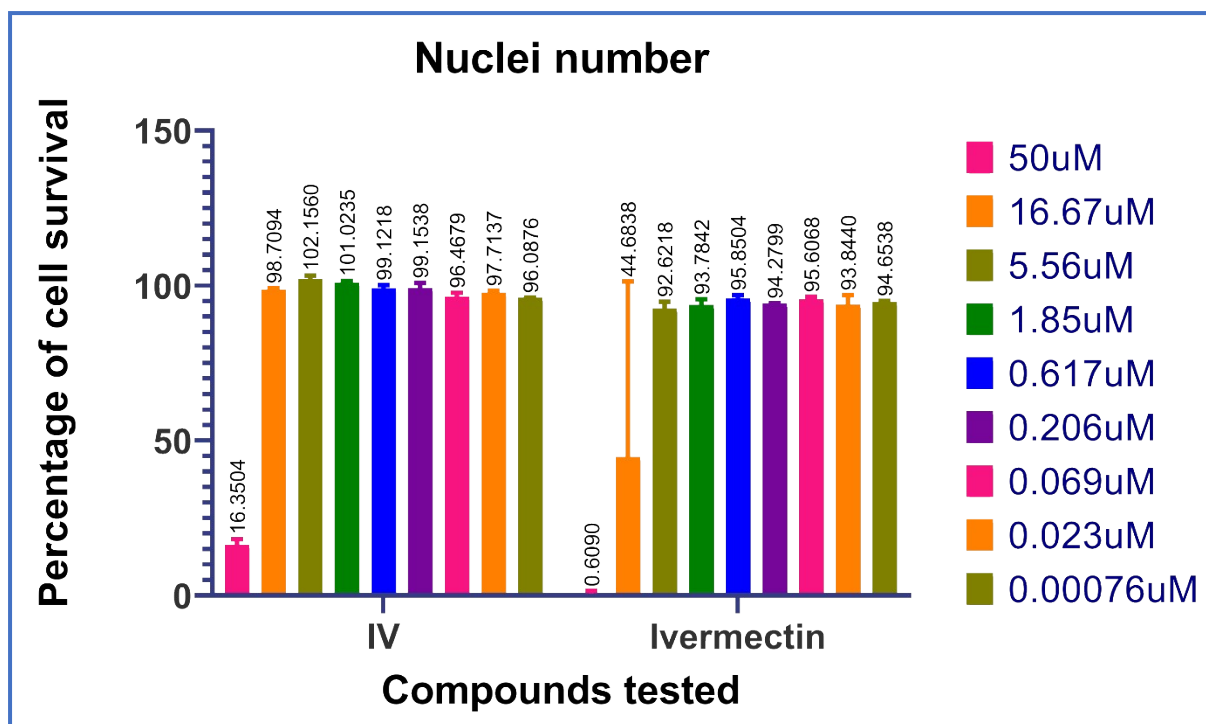

**Figure S7.** Cytotoxicity of Compounds tested. Effect of compounds tested on viability of Vero cell lines. Cells were seeded at 37 °C for 24 h prior to treatment with compounds. Cells were either treated with compounds (9 dilutions) for 48 h or treated with DMSO only as control. Cell viability was measured by total nuclei counting. Ivermectin showed toxicity at 16.67  $\mu$ M diluted concentration while at 50  $\mu$ M it completely wiped down the Vero cell population. Compound **IV** showed some toxicity at 50  $\mu$ M concentration which is nearly three times its IC50 value. Compound **IV** was far less cytotoxic to Vero cell line compared to FDA approved drug ivermectin.
